# Supplementary material for: Predicting the risk of future diabetic foot ulcer occurrence: a prospective cohort study of patients with diabetes in Tanzania
Source: PubMed Central journal article supplement — BMJ Open Diabetes Res Care. 2020 May 5;8(1):e001122. doi: 10.1136/bmjdrc-2019-001122 (PMC7228475; doi:10.1136/bmjdrc-2019-001122), 2020-05-05
Supplement: bmjdrc-2019-001122supp004.pdf [file bmjdrc-2019-001122supp004.pdf]

## Appendix 4:

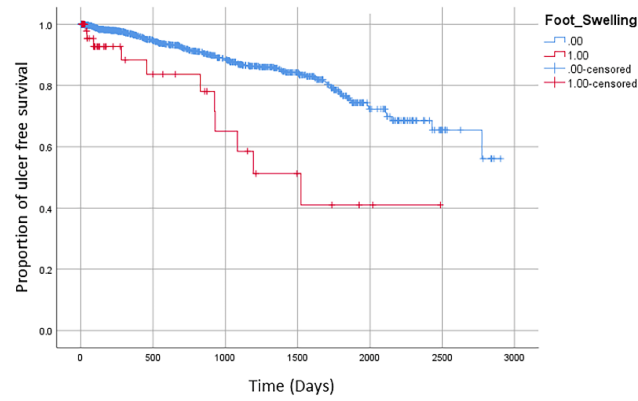

Kaplan-Meier graphs representing the differences in survival times for patients with (code 1) vs those with no (code 0) Foot Swelling ( Oedema).

Classification: Restricted
